# Supplementary material for: Dynamic Prediction of Mechanical Thrombectomy Outcome for Acute Ischemic Stroke Patients Using Machine Learning
Source: MDPI journal article supplement (doi:10.3390/brainsci12070938), 2022-07-18
Supplement: s1 [file s1]

**Supplementary Table S1. Hyper-parameters of each XGBoost model.**

| Model             | Hyper-parameters | parameter values |
|-------------------|------------------|------------------|
| “Admission” model | n_estimators     | 130              |
|                   | max_depth        | 5                |
|                   | min_child_weight | 6                |
|                   | Seed             | 2                |
|                   | gamma            | 0.1              |
|                   | colsample_bytree | 0.4              |
|                   | subsample        | 0.4              |
|                   | reg_alpha        | 0                |
|                   | reg_lambda       | 1                |
|                   | learning_rate    | 0.06             |
| “24-Hour” model   | n_estimators     | 100              |
|                   | max_depth        | 8                |
|                   | min_child_weight | 5                |
|                   | Seed             | 0                |
|                   | gamma            | 0.1              |
|                   | colsample_bytree | 0.6              |
|                   | subsample        | 0.6              |
|                   | reg_alpha        | 0                |
|                   | reg_lambda       | 1                |
|                   | learning_rate    | 0.05             |
| “3-Day” Model     | n_estimators     | 100              |
|                   | max_depth        | 8                |
|                   | min_child_weight | 5                |
|                   | Seed             | 0                |
|                   | gamma            | 0.1              |
|                   | colsample_bytree | 0.6              |
|                   | subsample        | 0.6              |
|                   | reg_alpha        | 0                |
|                   | reg_lambda       | 1                |
|                   | learning_rate    | 0.05             |
| “Discharge” model | n_estimators     | 100              |
|                   | max_depth        | 8                |
|                   | min_child_weight | 3                |
|                   | Seed             | 1                |
|                   | gamma            | 0.1              |
|                   | colsample_bytree | 0.55             |
|                   | subsample        | 0.55             |
|                   | reg_alpha        | 0                |
|                   | reg_lambda       | 1                |
|                   | learning_rate    | 0.06             |

Abbreviations: XGBoost, eXtreme gradient boosting.

**Supplementary Table S2. The p-values of pairwise comparisons of AUCs on the testing set for different models with the Delong test.**

| Model             | “24H” model | “3Days” model | “Discharge” model | THRIVE | HIAT  |
|-------------------|-------------|---------------|-------------------|--------|-------|
| “Admission” model | 0.011       | 0.081         | 0.015             | 0.003  | 0.012 |
| “24H” model       |             | 0.235         | 0.021             | 0.001  | 0.008 |
| “3Days” model     |             |               | 0.139             | 0.002  | 0.003 |
| “Discharge” model |             |               |                   | 0.001  | 0.002 |
| THRIVE            |             |               |                   |        | 0.950 |

The significant difference between AUCs is defined as  $p\text{-value} < 0.05$ .  
Abbreviations: AUC, the area under receiver operating characteristic curve; THRIVE, Totaled Health Risks in Vascular Events; HIAT, Houston Intra-arterial Recanalization Therapy.

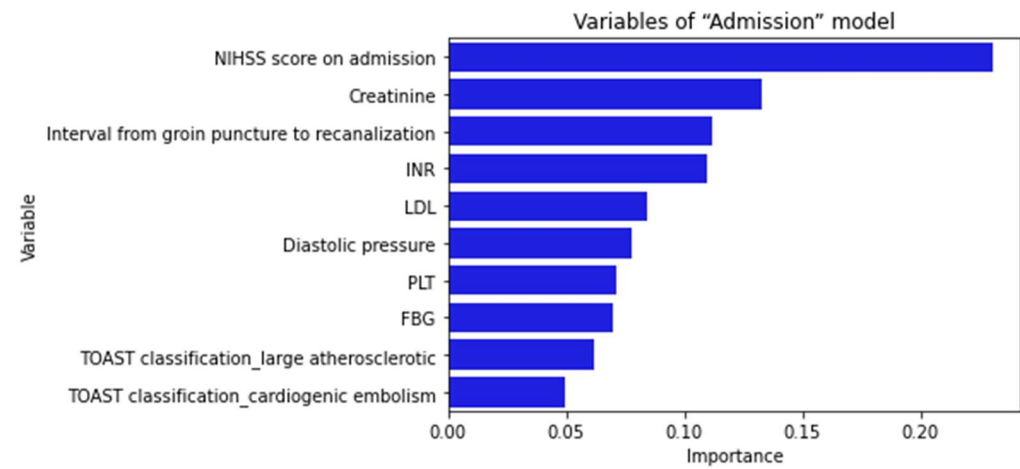

(a)

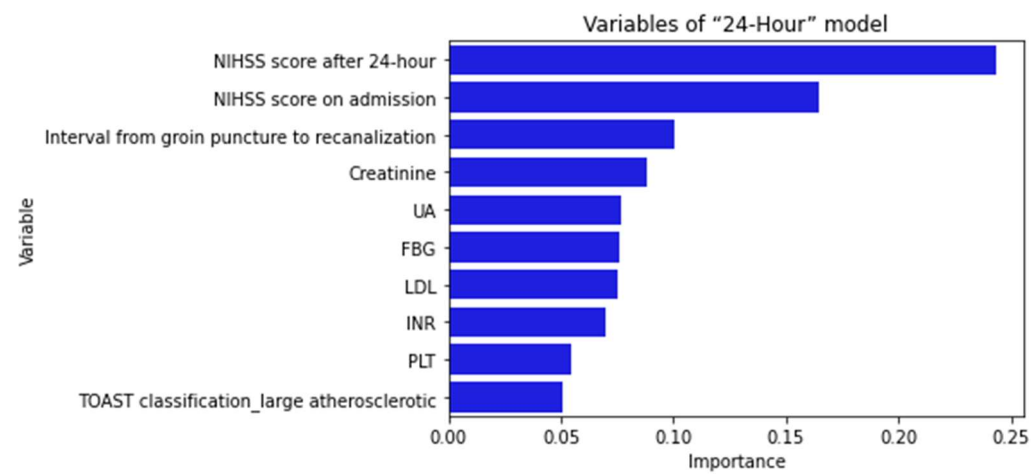

(b)

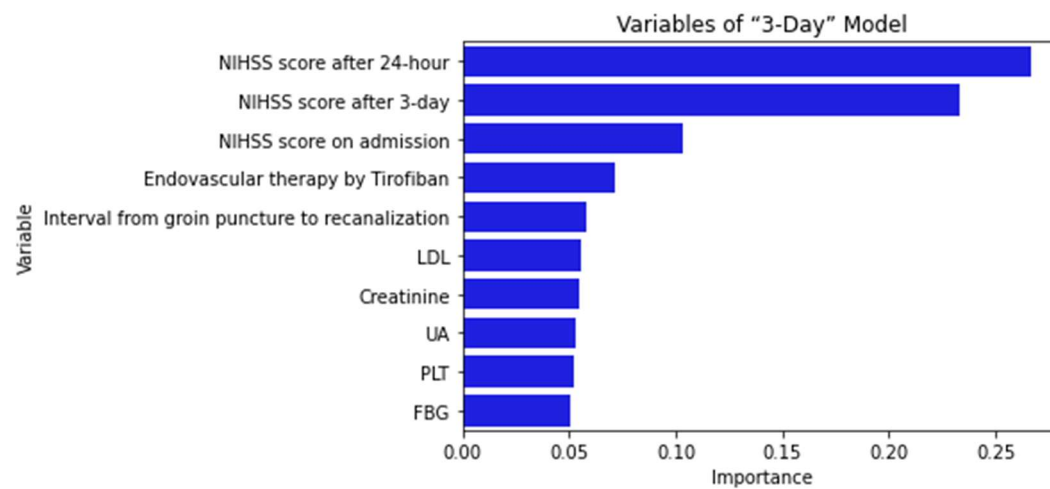

(c)

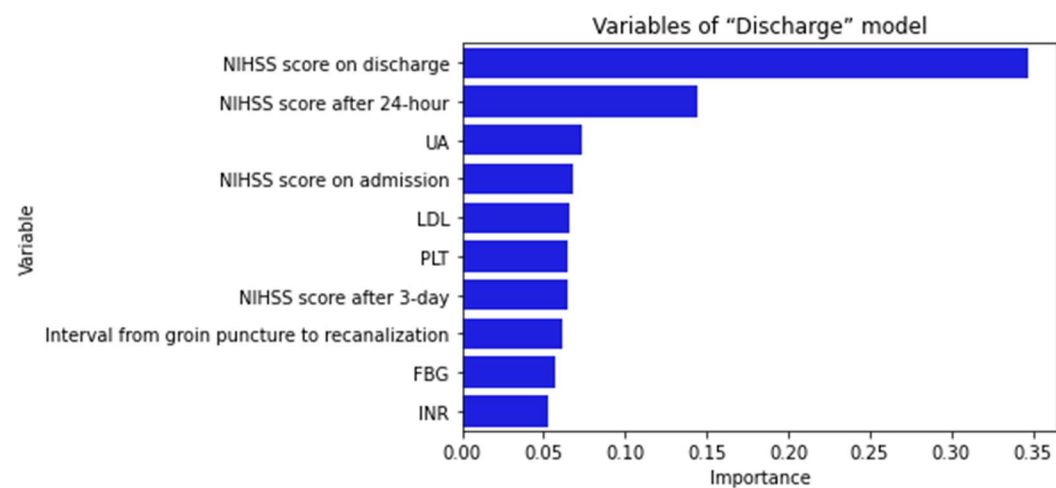

(d)

**Supplementary Figure S1.** (a) Top 10 features selected using eXtreme gradient boosting (XGBoost) and the corresponding variable importance score in "Admission" model; (b) Top 10 features selected using XGBoost and the corresponding variable importance score in "24-Hour" model; (c) Top 10 features selected using XGBoost and the corresponding variable importance score

in “3-Day” model; (d) Top 10 features selected using XGBoost and the corresponding variable importance score in “Discharge” model. X-axis indicates the importance score which is the relative number of a variable that is used to distribute the data, Y-axis indicates the top 10 weighted variables. NIHSS, National Institute of Health stroke scale; INR, International normalized ratios; LDL, Low density lipoprotein; PLT, Platelet; FBG, Fasting blood glucose; TOAST, Trial of ORG 10172 in Acute Stroke Treatment; UA, Uric Acid
